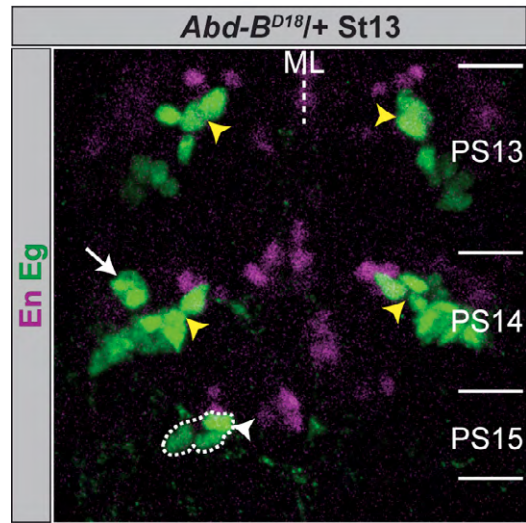

**Fig. S1. In *Abdominal-B* mutants the Eagle pattern is affected in a dose-dependent manner.** Flat preparation (maximum projection) of a St13 *Abd-B<sup>D18</sup>* heterozygous mutant embryo, stained against Eg and En. PSs are depicted on the right and their borders are illustrated by a solid line. The typical medial location of the NB7-3 cluster (Eg and En positive) is marked by yellow arrowheads. Ectopic NB7-3 cells, which do not exist in wild type, are surrounded by broken lines and indicated by white arrowheads. Neuronal NB6-4 progeny, which is never observed in wild-type abdomen, is marked by white arrows. This heterozygous embryo reveals an ectopic neuronal NB6-4 cluster (PS14) and NB7-3 cells (PS15) in only one hemineuromere. ML, midline.

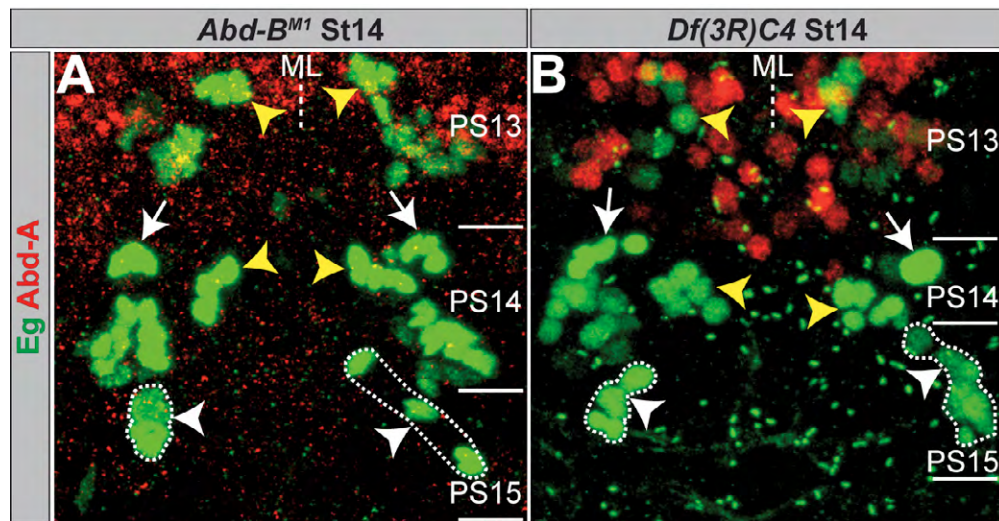

**Fig. S2. Abdominal-A expression in *Abdominal-B* mutants.** (A,B) Flat preparations (maximum projections) of St14 embryos of the indicated genotype double-stained against Eg and Abd-A. PSs are depicted on the right and their borders are illustrated by a solid line. The wild-type NB7-3 clusters are marked by yellow arrowheads; ectopic ones are surrounded by broken lines and highlighted by white arrowheads. Ectopic neuronal NB6-4 clusters are depicted by white arrows. ML, midline.

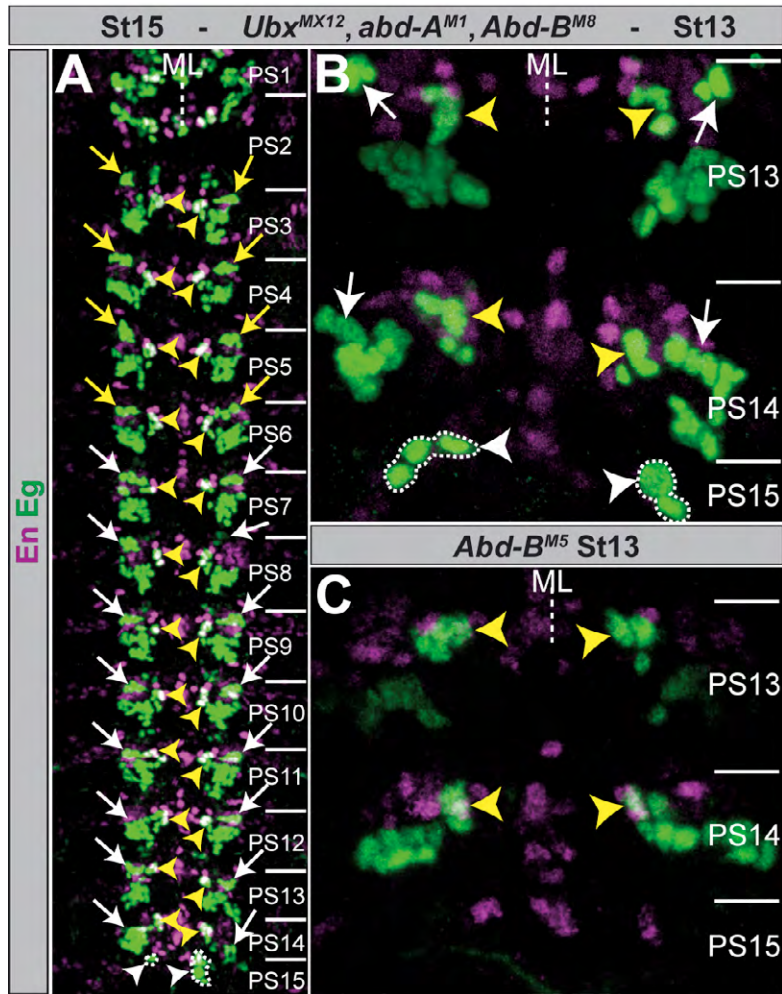

**Fig. S3. Eagle expression in *Bithorax* triple mutants and in *Abd-B<sup>M5</sup>*.** (A-C) Flat preparations (maximum projections) of St13 or St15 embryos of the indicated genotype double-stained against Eg and En. PSs are depicted on the right and their borders are illustrated by a solid line. The wild-type NB7-3 clones are marked by yellow arrowheads. (A,B) Wild-type NB6-4 neuronal subclones are depicted by yellow arrows. Ectopic NB6-4 neuronal subclones in the abdomen are highlighted by white arrows. Ectopic NB7-3 cells in PS15 are surrounded by dashed lines and marked by white arrowheads. (A) Please note the occurrence of NB6-4 neuronal subclones in every PS, which reflects the transformation to ground state (T2=pPS4 + aPS5). ML, midline.

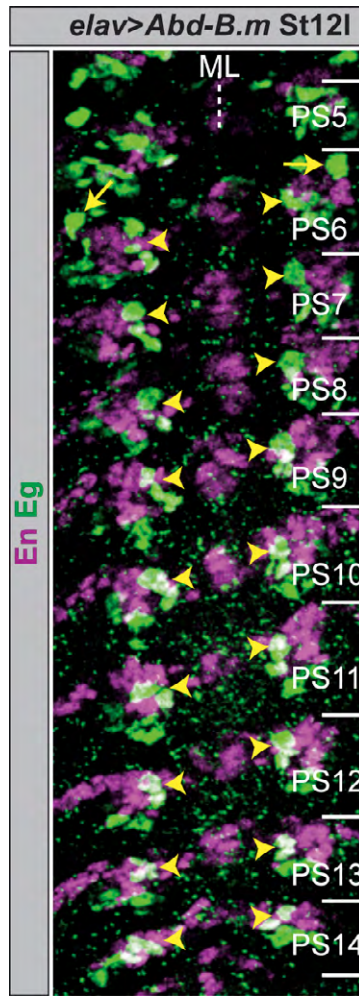

**Fig. S4. Late ectopic *Abdominal-B.m* expression.** Flat preparation (maximum projection) of a St12l embryo, stained against Eg and En. *elav*-Gal4 driven *Abd-B.m* does not remove the NB7-3 cells in thorax or abdomen. PSs are depicted on the right and their borders are illustrated by a solid line. NB7-3 cells are marked by yellow arrowheads. Neuronal NB6-4 clusters in the thorax are highlighted by yellow arrows. ML, midline

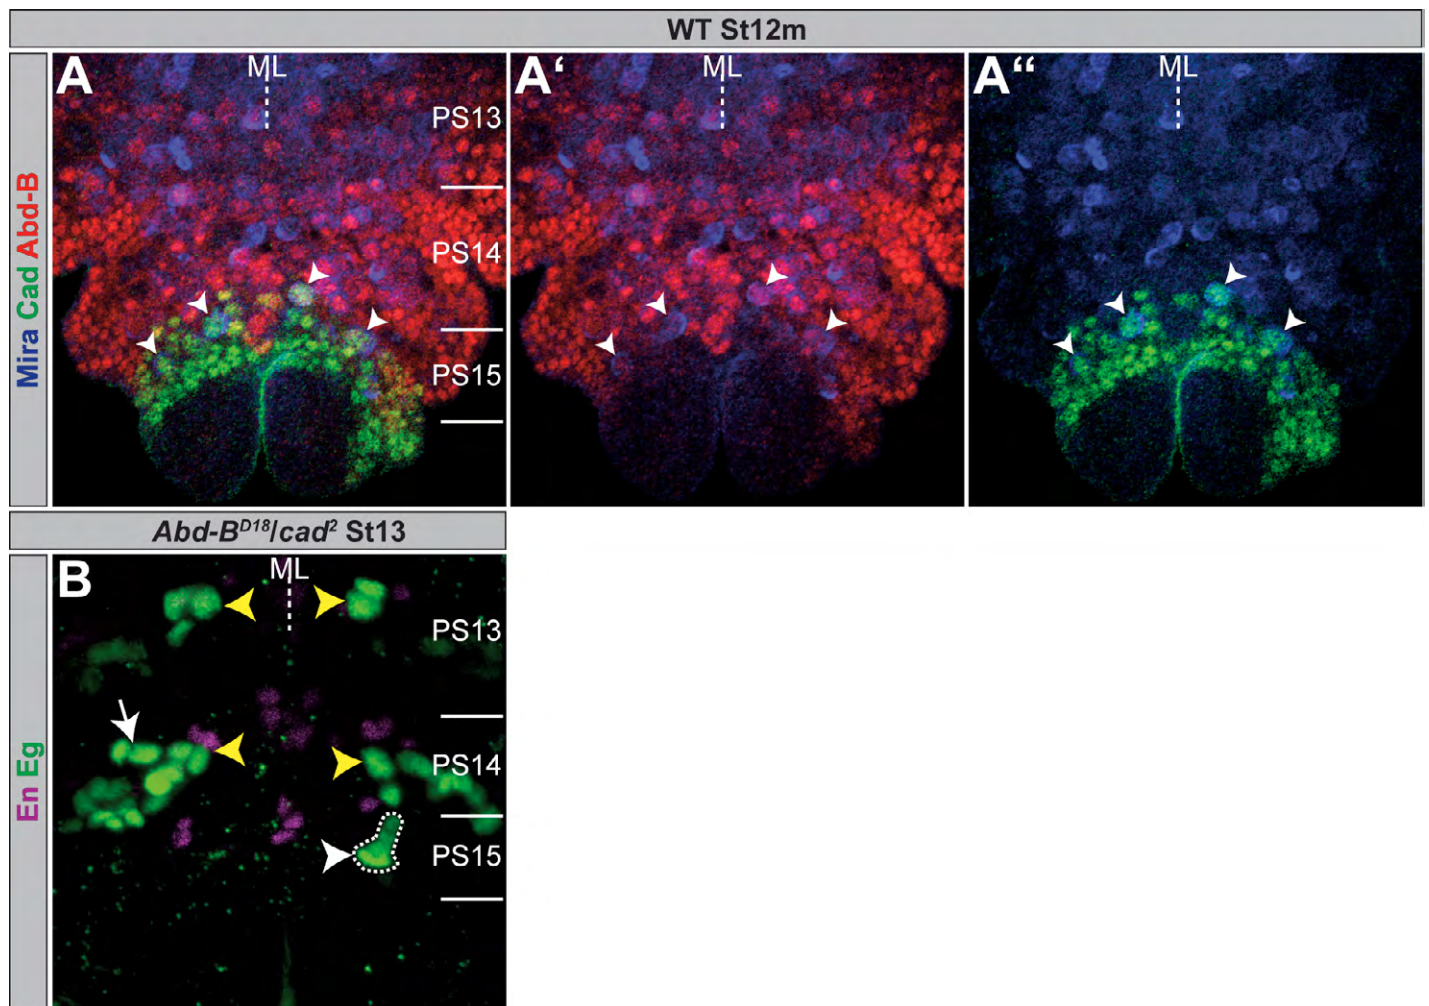

**Fig. S5. Caudal expression in terminal neuroblasts and Eagle expression in a *caudal<sup>2</sup>/Abdominal-B<sup>D18</sup>* transheterozygous situation.** Flat preparations (maximum projections) of St12m and St13 of the indicated genotype, double- or triple-stained as illustrated. PSs are depicted on the right and their borders are illustrated by a solid line. (**A-A''**) Arrowheads mark NBs, identified by the expression of Miranda (Mira) (Ikeshima-Kataoka et al., 1997; Shen et al., 1997), their location and their size. They co-express Abd-B.r and Cad. (**A'**) Mira and Abd-B; (**A''**) Mira and Cad. (**B**) Yellow arrowheads depict regular NB7-3 cells. The ectopic one in PS15 is marked by a white arrowhead and surrounded by a dashed line. The white arrow points to an ectopic neuronal NB6-4 cluster in PS14. ML, midline; WT, wild type.

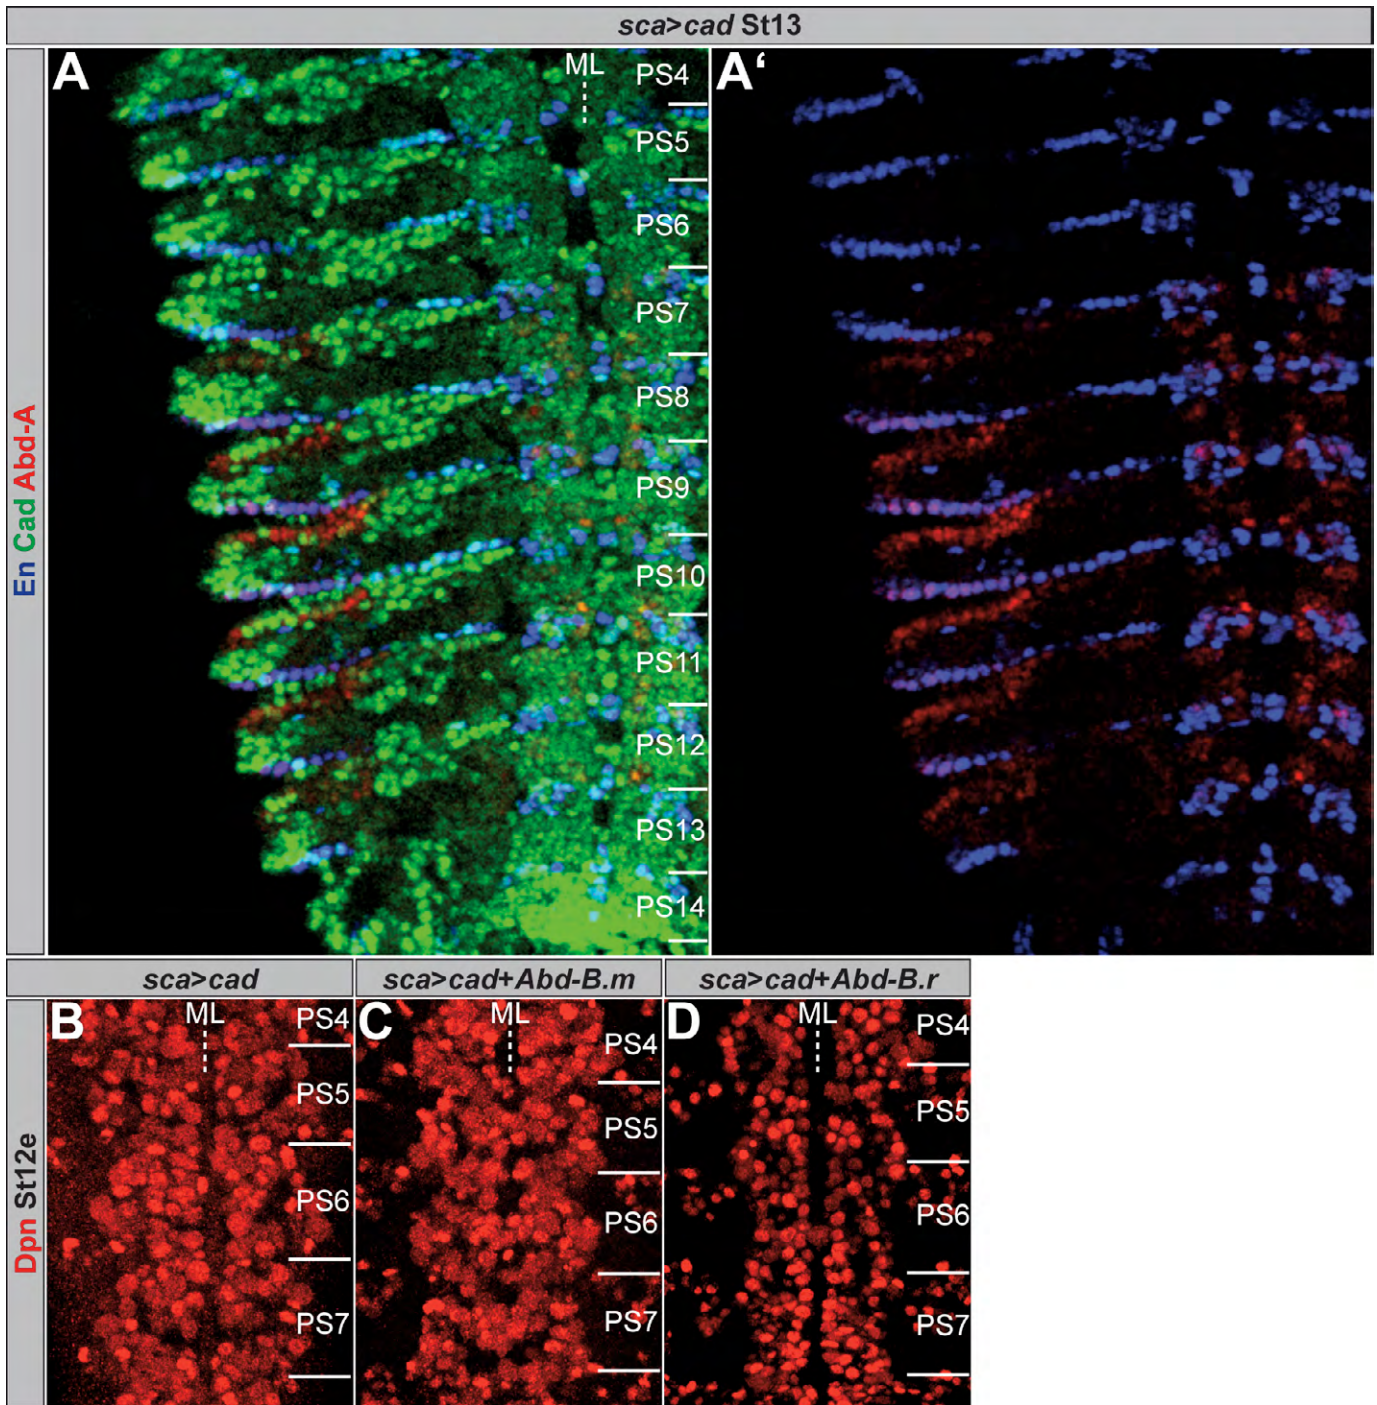

**Fig. S6. Ectopic expression of *caudal* results in a downregulation of Abdominal-A and inhibition of neuroblast formation.** Flat preparations (maximum projections) of St12e or St13 embryos of the indicated genotype, stained as illustrated. PSs are depicted on the right and their borders are illustrated by a solid line. (A) Repression of Abd-A expression by ectopic *cad*; (A') the blue and red channel. (B-D) Inhibition of NB formation by ectopic *cad* (B) is significantly enhanced by ectopic co-expression of *Abd-B.m* (C) or *Abd-B.r* (D). ML, midline.
